# Supplementary material
Source: publisher figshare collection journal article supplement (https://frontiersin.figshare.com/ndownloader/files/25304681)
Supplement: Supplementary file 1 [file 25304681]

## Sheet: Sheet1
2018-05-01
DATE dd-05-2018	EXPLOSIONS	TREMOR
		Non-Harmonic	Harmonic	Chugging
17	8
18	135	19:02:00 (10 min)	16:28:30 (10 min)
			18:20:00 (15 min)
			20:00:00 (3 h)
19	90	06:42:00 (5 min)	00:37:00 (15 min)	03:03:00 (1 h)
		11:07:00 (1 min)	01:48:00 (40 min)	11:32:00 (15 min)
		22:51:00 (2 h)	02:35:00 (30 min)
			07:19:00 (15 min)
20	125	19:50:00 (4 h)		21:45:33 (1 min)
21	100	(episodic) All day	01:18:00 (15 min)	01:19:16 (12 min)
			09:55:20 (1 h)	08:04:00 (10 min)
				08:46:00 (5 min)
				12:00:00 (12 h)
22	20	(episodic) All day	00:37:00 (2 min)	(episodic) All day
			03:20:00 (5 min)
			09:55:00 (10 min)
			14:49:00 (10 min)
			20:24:00 (5 min)
			21:57 (5 min)
23	18	(Episodic) All day	02:21:00 (5 min)	11:53:00 (1 h)
			12:12:00 (1 h)	15:39:00 (15 min)
